# Supplementary material for: Long-term exposure to estrogen enhances chemotherapeutic efficacy potentially through epigenetic mechanism in human breast cancer cells
Source: PubMed Central journal article supplement (PMC5360320; doi:10.1371/journal.pone.0174227), 2017-03-21
Supplement: pone.0174227.s001.pdf [file pone.0174227.s001.pdf]

**Raw data for absorbance value from plate reader**

570nm

|  | 1      | 2      | 3      | 4      | 5      |
|--|--------|--------|--------|--------|--------|
|  | 0.43   | 0.4788 | 0.49   | 0.4562 | 0.4408 |
|  | 0.4934 | 0.3982 | 0.5428 | 0.4069 | 0.4484 |
|  | 0.5319 | 0.4069 | 0.3943 | 0.4394 | 0.4337 |
|  | 0.4972 | 0.4214 | 0.5558 | 0.5295 | 0.5728 |
|  | 0.4393 | 0.4591 | 0.427  | 0.5521 | 0.5286 |
|  | 0.4846 | 0.5171 | 0.554  | 0.4671 | 0.5302 |
|  | 0.4108 | 0.3699 | 0.4751 | 0.4917 | 0.4868 |
|  | 0.4474 | 0.4431 | 0.4492 | 0.5025 | 0.5214 |

630nm

|  | 1      | 2      | 3      | 4      | 5      |
|--|--------|--------|--------|--------|--------|
|  | 0.1691 | 0.1858 | 0.1871 | 0.176  | 0.1713 |
|  | 0.1895 | 0.1591 | 0.2037 | 0.159  | 0.1723 |
|  | 0.2003 | 0.1598 | 0.1554 | 0.1694 | 0.1708 |
|  | 0.1977 | 0.1648 | 0.2061 | 0.2098 | 0.2162 |
|  | 0.1693 | 0.1756 | 0.1697 | 0.2193 | 0.2108 |
|  | 0.1841 | 0.2051 | 0.2071 | 0.1787 | 0.1993 |
|  | 0.1609 | 0.1493 | 0.1869 | 0.1882 | 0.1885 |
|  | 0.1723 | 0.171  | 0.177  | 0.1906 | 0.2014 |

**570nm-630nm**

MCF-7P

Untreated Control

|        |       |        |
|--------|-------|--------|
| 0.2609 | 0.293 | 0.3029 |
|--------|-------|--------|

MCF-7E

Untreated Control

|        |       |        |
|--------|-------|--------|
| 0.3005 | 0.312 | 0.3469 |
|--------|-------|--------|

**These final values were used and exported to sigmaplot to draw final figure 1A**

|        |                   |        |        | mean   | mean/               |
|--------|-------------------|--------|--------|--------|---------------------|
| MCF-7P | Untreated Control | 0.2609 | 0.293  | 0.3029 | 0.2856 91.351541    |
|        | Cisplatin-300nM   | 0.2365 | 0.2379 | 0.2414 | 0.2386 99.119866    |
|        | Doxorubicin-10 nM | 0.228  | 0.2335 | 0.2269 | 0.2294667 99.360837 |
| MCF-7E | Untreated Control | 0.3005 | 0.312  | 0.3469 | 0.3198 93.964978    |
|        | Cisplatin-300nM   | 0.2175 | 0.1921 | 0.1942 | 0.2012667 108.06558 |
|        | Doxorubicin-10 nM | 0.2015 | 0.1825 | 0.1919 | 0.1919667 104.96614 |

| 6      | 7      | 8      | 9      | 10     | 11     | 12     |
|--------|--------|--------|--------|--------|--------|--------|
| 0.4397 | 0.3807 | 0.3879 | 0.3788 | 0.2872 | 0.2446 | 0.2103 |
| 0.4659 | 0.4372 | 0.3992 | 0.4438 | 0.395  | 0.3978 | 0.4003 |
| 0.4012 | 0.3178 | 0.3861 | 0.3465 | 0.223  | 0.2606 | 0.2363 |
| 0.4254 | 0.4684 | 0.4452 | 0.4645 | 0.3877 | 0.3913 | 0.3928 |
| 0.4974 | 0.3514 | 0.3249 | 0.3627 | 0.2538 | 0.253  | 0.3501 |
| 0.6115 | 0.4346 | 0.4166 | 0.4813 | 0.3626 | 0.335  | 0.3411 |
| 0.455  | 0.4354 | 0.3085 | 0.3493 | 0.2876 | 0.2919 | 0.2022 |
| 0.5328 | 0.455  | 0.4988 | 0.4818 | 0.3434 | 0.433  | 0.516  |

| 6      | 7      | 8      | 9      | 10     | 11     | 12     |
|--------|--------|--------|--------|--------|--------|--------|
| 0.1707 | 0.1527 | 0.1544 | 0.1519 | 0.1222 | 0.1083 | 0.0967 |
| 0.1791 | 0.1732 | 0.1652 | 0.1749 | 0.1585 | 0.1599 | 0.1589 |
| 0.1566 | 0.132  | 0.1541 | 0.1428 | 0.1002 | 0.1127 | 0.1047 |
| 0.1736 | 0.1821 | 0.1756 | 0.1892 | 0.1589 | 0.1559 | 0.1557 |
| 0.1963 | 0.1499 | 0.1424 | 0.1708 | 0.1106 | 0.109  | 0.1477 |
| 0.2263 | 0.172  | 0.1663 | 0.1888 | 0.1451 | 0.1429 | 0.1469 |
| 0.1797 | 0.1675 | 0.1342 | 0.1443 | 0.1236 | 0.1257 | 0.0936 |
| 0.2207 | 0.1747 | 0.2026 | 0.1851 | 0.1406 | 0.1697 | 0.2001 |

Doxorubicin 10 nM

0.228 0.2335 0.2269

Cisplatin 300nM

0.2365 0.2379 0.2414

Doxorubicin 10 nM

0.2015 0.1825 0.1919

Cisplatin 300nM

0.2175 0.1921 0.1942

| 'control mean*100 | Normolizat | SEM       | p-value     |
|-------------------|------------|-----------|-------------|
| 102.59104         | 106.05742  | 100       | 7.687707475 |
| 99.706622         | 101.17351  | 83.543417 | 1.057789561 |
| 101.7577          | 98.881464  | 80.345472 | 1.540966856 |
| 97.560976         | 108.47405  | 100       | 7.555785515 |
| 95.445512         | 96.488904  | 62.935168 | 7.004456311 |
| 95.068588         | 99.965272  | 60.0271   | 4.948867218 |
