# Supplementary material for: Long-term exposure to estrogen enhances chemotherapeutic efficacy potentially through epigenetic mechanism in human breast cancer cells
Source: PubMed Central journal article supplement (PMC5360320; doi:10.1371/journal.pone.0174227), 2017-03-21
Supplement: pone.0174227.s002.pdf [file pone.0174227.s002.pdf]

**raw data from flow cytometry**

|                   | <b>G0/G1</b> |         | <b>S</b> |         |
|-------------------|--------------|---------|----------|---------|
| <b>MCF-7P</b>     |              |         |          |         |
| Untreated Control | 46.0499      | 49.3089 | 10.34    | 12.2462 |
| Cisplatin         | 56.3945      | 54.2313 | 8.16     | 8.00745 |
| Doxorubicin       | 47.626       | 50.042  | 4.84     | 5.74761 |
| <b>MCF-7E</b>     |              |         |          |         |
| Control           | 46.4286      | 47.8748 | 20.26    | 20.9558 |
| Cisplatin         | 52.5765      | 50.2536 | 12.1     | 13.2278 |
| Doxorubicin       | 52.9897      | 54.4252 | 8.47594  | 10.3764 |

**Average of the replicates with standrad error od the mean and p-value**

|               | <b>G0/G1</b> |           |           | <b>S</b> |           |           |
|---------------|--------------|-----------|-----------|----------|-----------|-----------|
| <b>MCF-7P</b> | Mean         | SEM       | p-value   | Mean     | SEM       | p-value   |
| Untreated (   | 47.6794      | 2.304461  |           | 11.2931  | 1.3478869 |           |
| Cisplatin     | 55.3129      | 1.5296134 | 0.0598153 | 8.083725 | 0.1078691 | 0.0784551 |
| Doxorubicir   | 48.834       | 1.70837   | 0.626618  | 5.293805 | 0.6417772 | 0.0295936 |
| <b>MCF-7E</b> |              |           |           |          |           |           |
| Untreated (   | 47.1517      | 1.0226178 | 0.7951318 | 20.6079  | 0.4920049 | 0.0116575 |
| Cisplatin     | 51.41505     | 1.6425383 | 0.0893901 | 12.6639  | 0.797475  | 0.0068849 |
| Doxorubicir   | 53.70745     | 1.0150518 | 0.0233116 | 9.42617  | 1.3438282 | 0.0080905 |

**These values were exported to sigmaplot for final graph as given figure 1B**

**G2/M**

|         |         |
|---------|---------|
| 24.64   | 27.7963 |
| 30.7346 | 26.3397 |
| 32.7988 | 29.256  |
| 23.4    | 19.7716 |
| 26.6707 | 26.3745 |
| 27.582  | 25.0458 |

**G2/M**

| Mean     | SEM       | p-value   |
|----------|-----------|-----------|
| 26.21815 | 2.2318411 |           |
| 28.53715 | 3.1076636 | 0.4816689 |
| 31.0274  | 2.5051379 | 0.1798594 |
| 21.5858  | 2.5656662 | 0.9372129 |
| 26.5226  | 0.209445  | 0.8162789 |
| 26.3139  | 1.7933642 | 0.8468075 |
